# Supplementary figures and images for: An Integrated Geographical Approach of the Spatiotemporal Distribution of COVID-19 in Minas Gerais State, Brazil
Source: Preprints.org preprint supplement (doi:10.20944/preprints202305.1793.v1), 2023-05-25

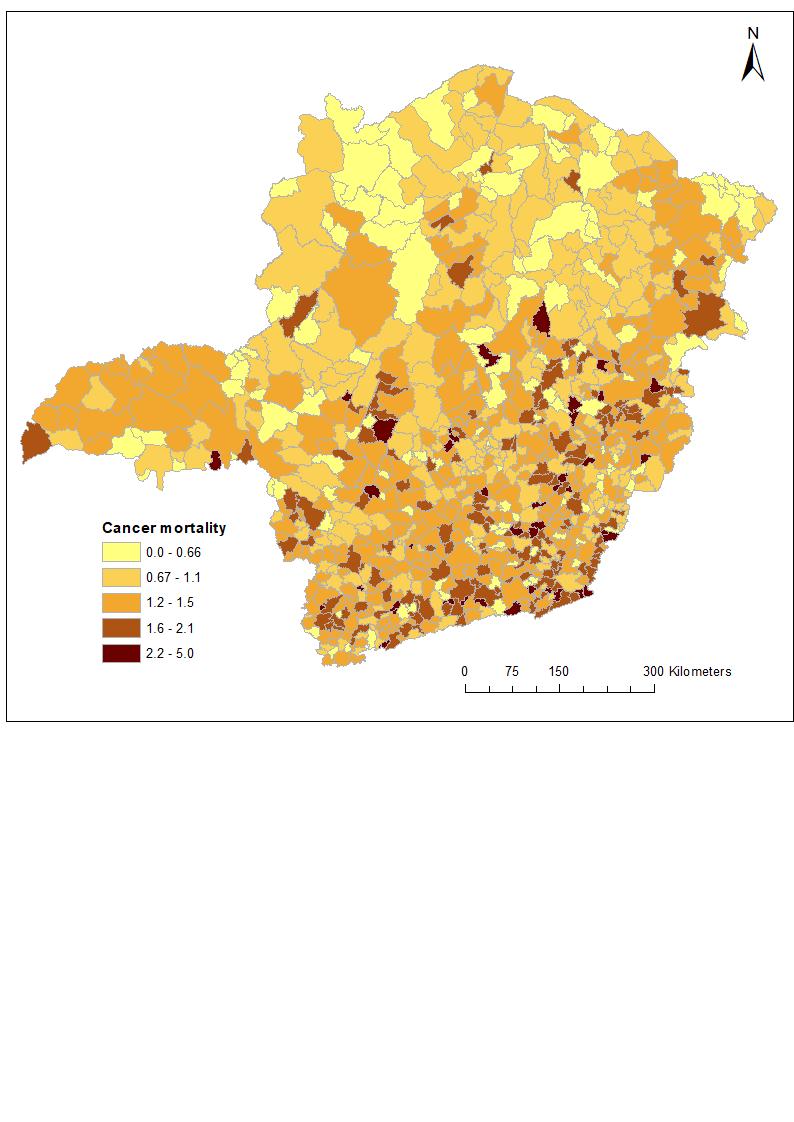

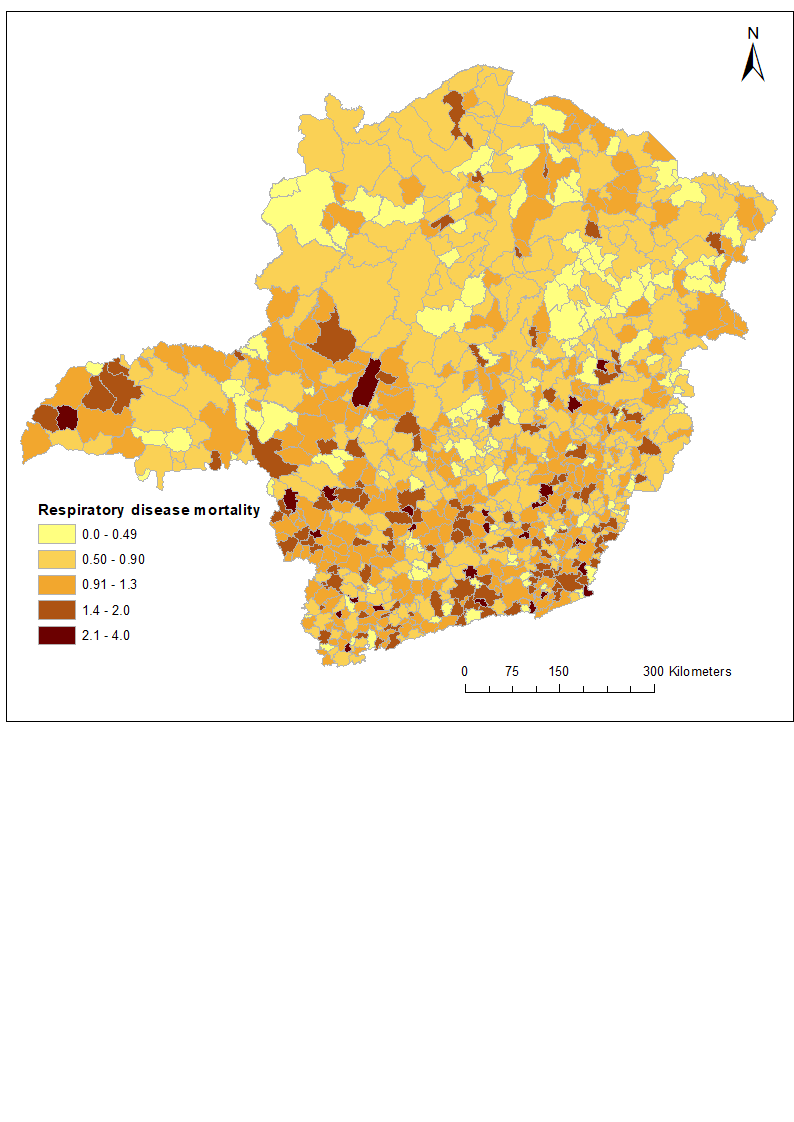

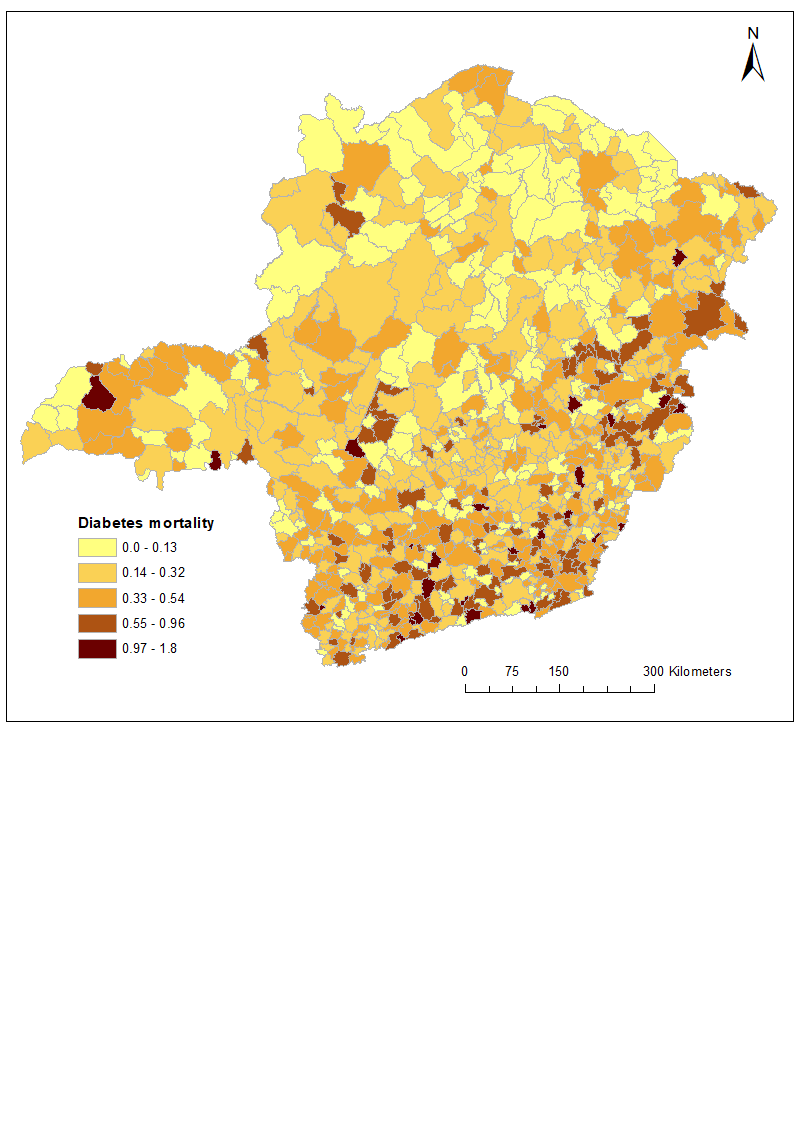

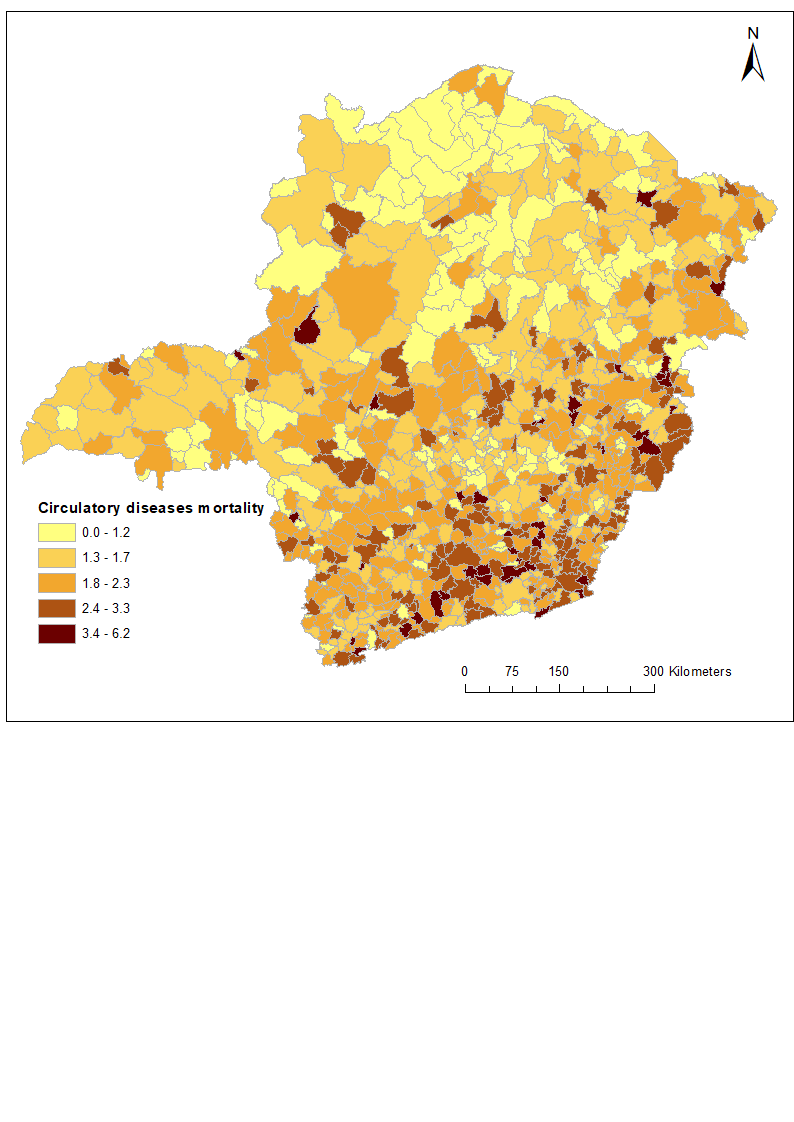

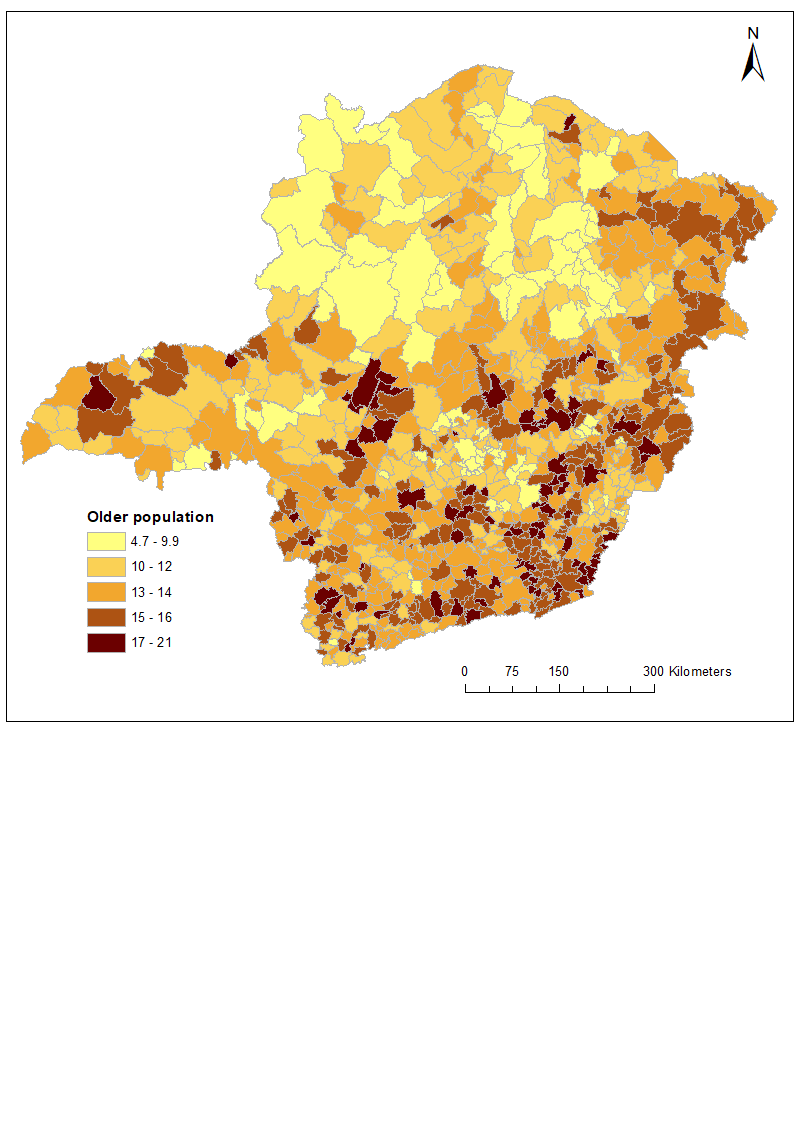

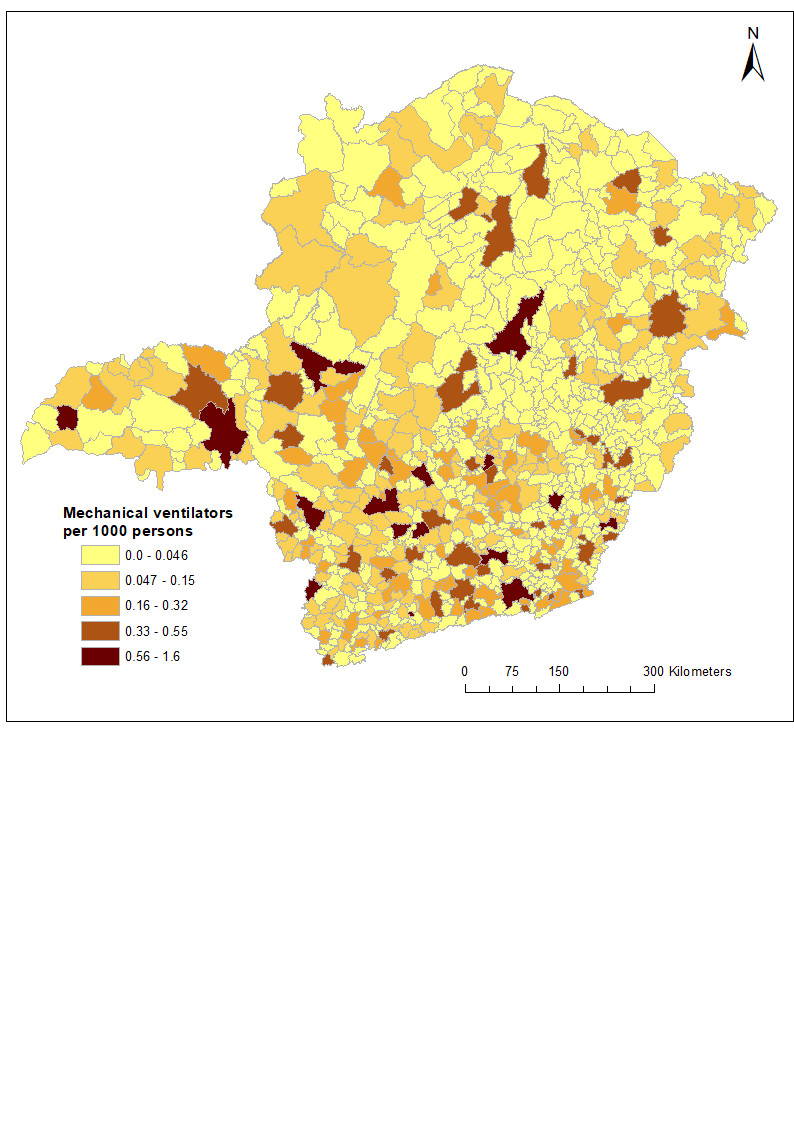

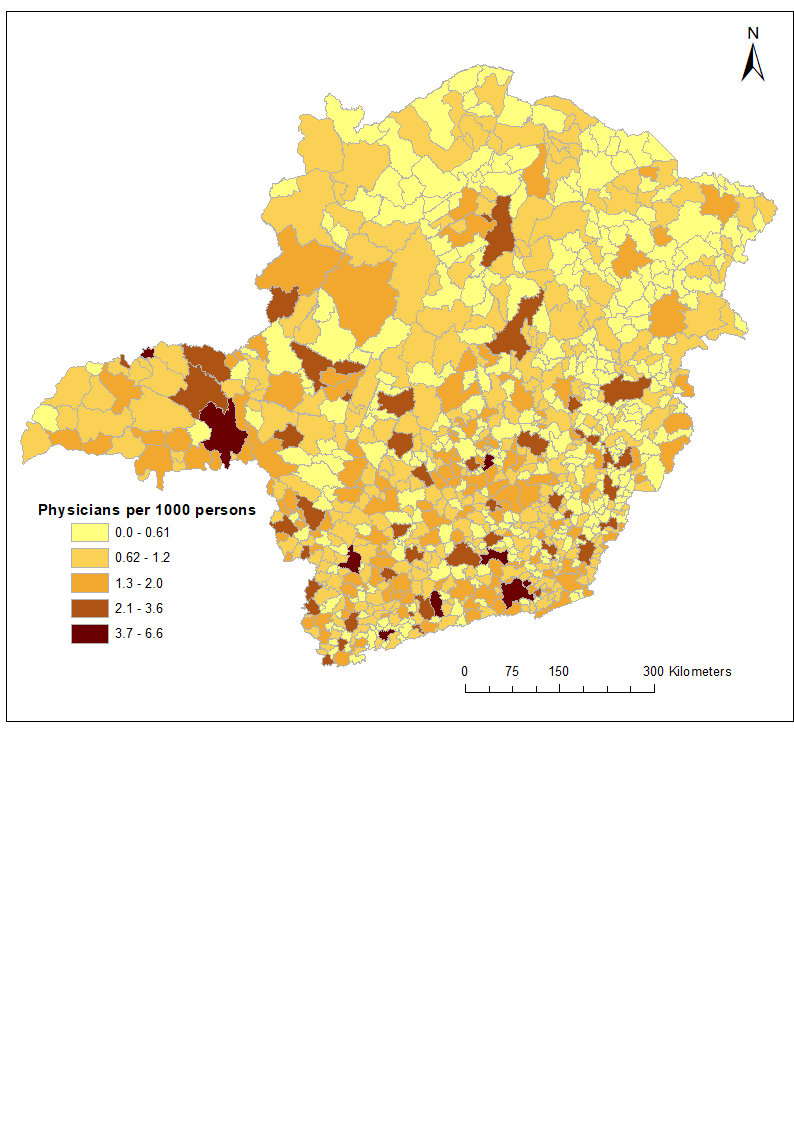

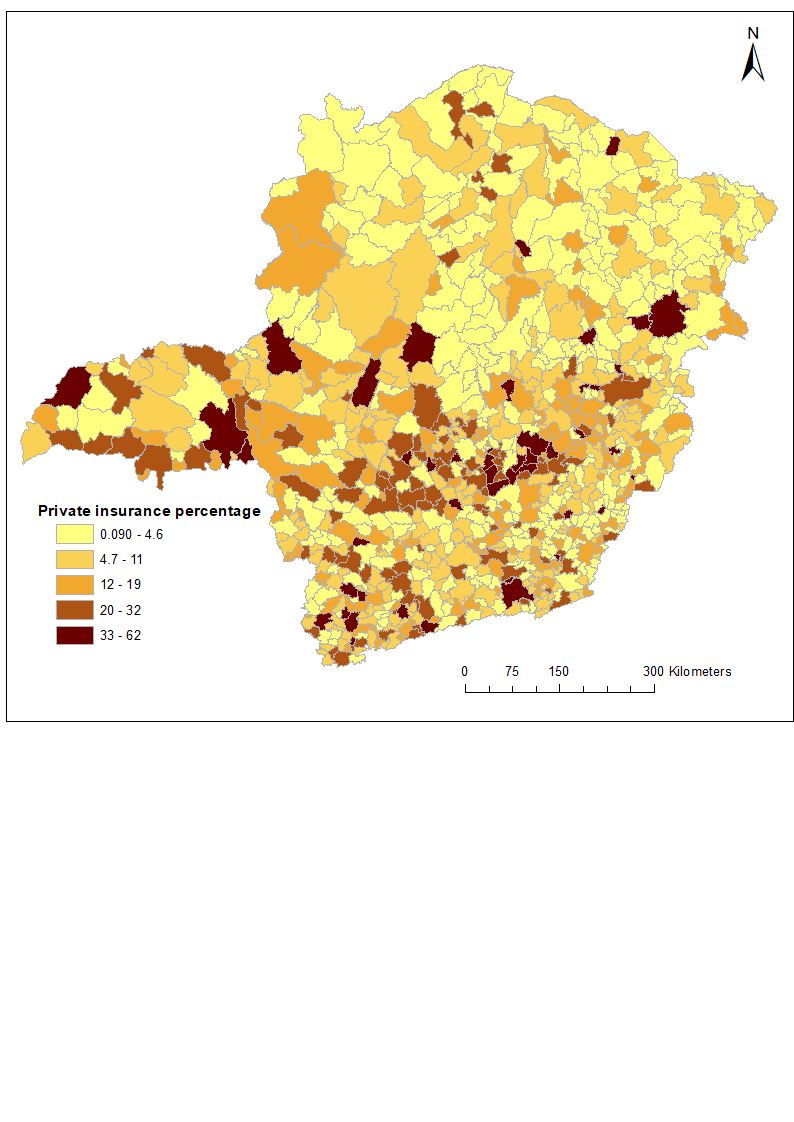

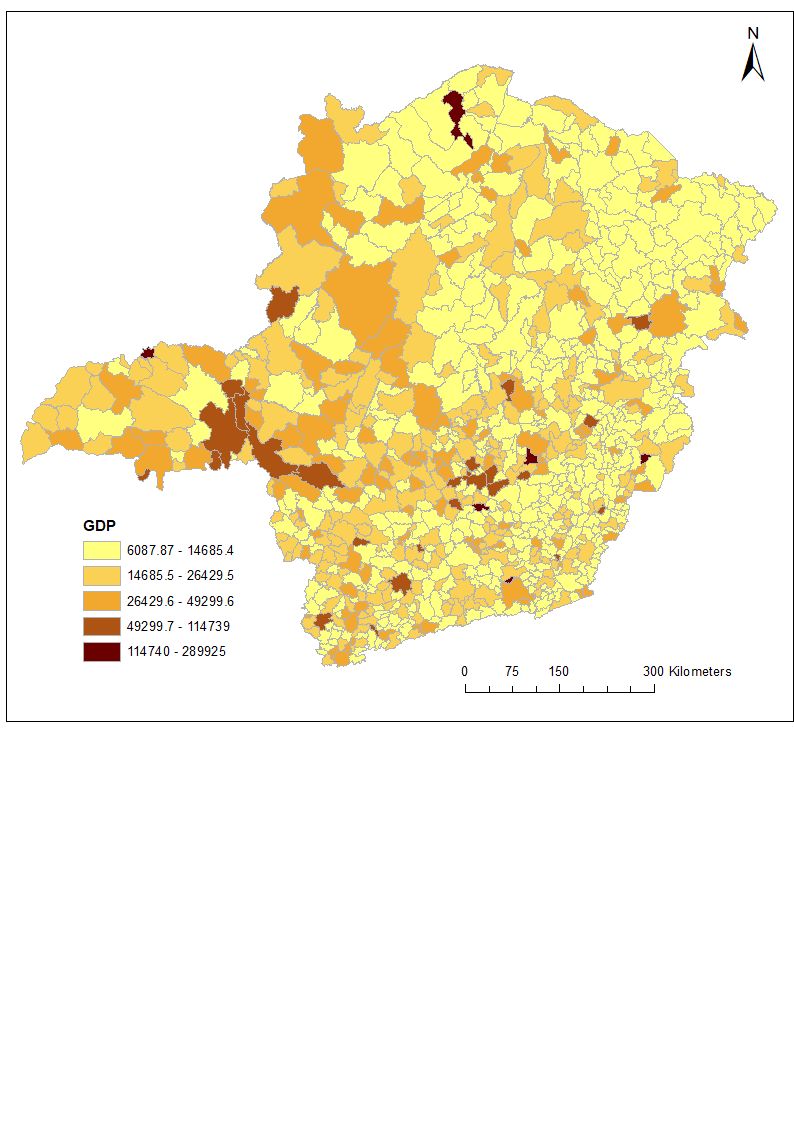

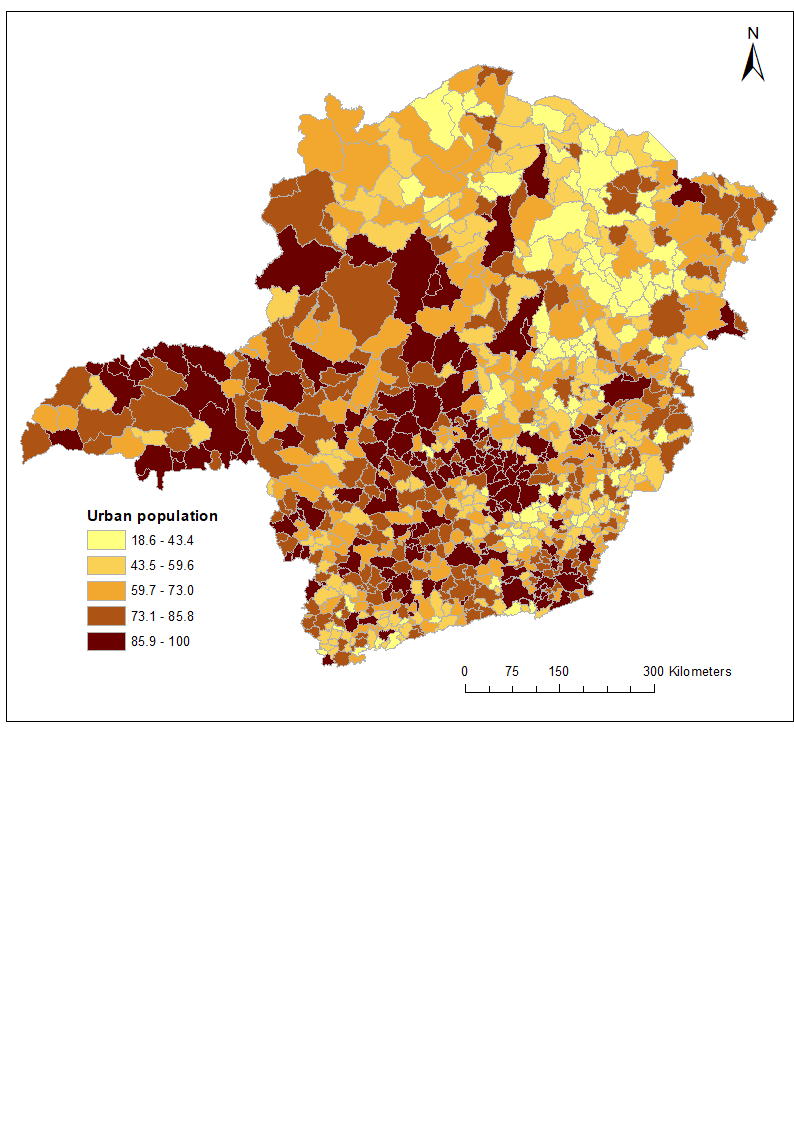

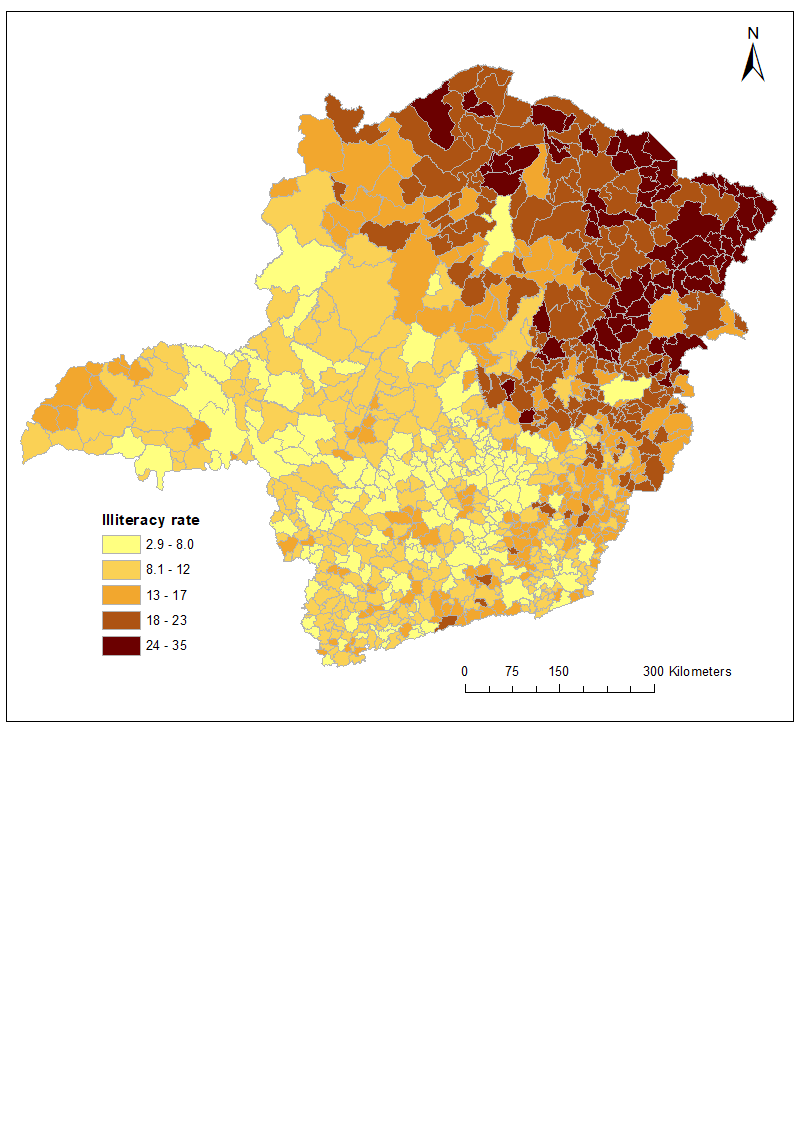

Supplement: Supplementary file 1 [file supplementary]
